# Supplementary material for: Retrospective Analysis of the Short-Term Safety of ECT in Patients With Neurological Comorbidities: A Guide for Pre-ECT Neurological Evaluations
Source: Atypon-hosted journal article supplement (doi:10.1176/appi.neuropsych.14080195), 2015-02-06
Supplement: appi.neuropsych.14080195.ds001.pdf [file appi.neuropsych.14080195.ds001.pdf]

**Supplemental Material (S1). Single case reports relevant to the practice of electroconvulsive therapy in patients with neurological comorbidities.**

- Anwar N, Brakoulias V. Safety of electroconvulsive therapy after subdural haemorrhage. *The Australian and New Zealand journal of psychiatry*. Mar 2010;44(3):294.
- Baez MA, Avery J. Improvement in drug-induced parkinsonism with electroconvulsive therapy. *The American journal of geriatric pharmacotherapy*. Jun 2011;9(3):190-193.
- Boshes RA, Afonso JA, Tanev K. Treatment of Meige's syndrome with ECT. *J ECT*. Jun 1999;15(2):154-157.
- Bruce BB, Henry ME, Greer DM. Ischemic stroke after electroconvulsive therapy. *J ECT*. Jun 2006;22(2):150-152.
- Chathanchirayil SJ, Bhat R. Post-electroconvulsive therapy status epilepticus and tardive seizure in a patient with rapid cycling bipolar disorder, epilepsy, and intellectual disability. *J ECT*. Sep 2012;28(3):183-184.
- Coffey CE, Hoffman G, Weiner RD, Moossy JJ. Electroconvulsive Therapy in a Depressed Patient with a Functioning Ventriculoatrial Shunt. *Convul Ther*. 1987;3(4):302-306.
- DeBattista C, Mueller K. Sumatriptan prophylaxis for postelectroconvulsive therapy headaches. *Headache*. 1995;35:502-503.
- Ducharme S, Flaherty AW, Seiner SJ, Dougherty DD, Morales OG. Temporary interruption of deep brain stimulation for Parkinson's disease during outpatient electroconvulsive therapy for major depression: a novel treatment strategy. *J Neuropsychiatry Clin Neurosci*. Spring 2011;23(2):194-197.
- Everman Jr PD, Kellner CH, Beale MD, Burns C. Modified electrode placement in patients with neurosurgical skull defects. *J ECT*. 1999;15(3):237-239.
- Farah A, McCall WV, Amundson RH. ECT after cerebral aneurysm repair. *J ECT*. 1996;12(3):165-170.
- Felkel WC, 2nd, Wagner G, Kimball J, Rosenquist P, McCall WV, Arias L. Tardive seizure with postictal aphasia: a case report. *J ECT*. Sep 2012;28(3):180-182.
- Folkerts H. Migraine after electroconvulsive therapy. *Convul Ther*. 1995;11:212-215.
- Fischer CE. Experience of electroconvulsive therapy in a case of glioblastoma multiforme. *Psychiatry and clinical neurosciences*. Dec 2004;58(6):671.
- Garcia RF, Dias AG, de Freitas AR, Fontenelle LF. Short-lived response of cervical dystonia to electroconvulsive therapy. *J ECT*. Jun 2009;25(2):135-136.
- Gassel MM. Deterioration after electroconvulsive therapy in patients with intracranial meningioma. *Arch Gen Psy*. Nov 1960;3:504-506.
- Gursky JT, Rummans TA, Black JL. ECT administration in a patient after craniotomy and gamma knife surgery: a case report and review. *J ECT*. Sep 2000;16(3):295-299.
- Hanretta AT, Malek-Ahmadi P. Successful ECT in a patient with hydrocephalus, shunt, hypopituitarism, and paraplegia. *J ECT*. Mar 2001;17(1):71-74.
- Harmandayan M, Romanowicz M, Sola C. Successful use of ECT in post-stroke depression. *General hospital psychiatry*. Jan-Feb 2012;34(1):102.e105-106.
- Hawken ER, Delva NJ, Lawson JS. Successful use of propranolol in migraine associated with electroconvulsive therapy. *Headache*. Jan 2001;41(1):92-96.
- Jain M, Arya A, Jha DK, Mehrotra S, Sarma U, Mehra A. Aggravated Spinal Cord Compression following Electroconvulsive Therapy. *Journal of anaesthesiology, clinical pharmacology*. Oct 2010;26(4):572.
- Kaufman KR, Saucedo C, Schaeffer J, Levesque M, Scannell T, Glouberman M. Electroconvulsive therapy (ECT) for intractable depression following epilepsy neurosurgery. *Seizure : the journal of the British Epilepsy Association*. Dec 1996;5(4):307-312.
- Kellner CH, Tolhurst JE, Burns CM. ECT in the Presence of Severe Cervical Spine Disease. *Convul Ther*. 1991;7(1):52-55.
- Kranaster L, Hoyer C, Krisam M, Deuschle M, Janke C, Sartorius A. Electroconvulsive therapy in a patient after radiation treatment of a brain metastasis: a case report. *J ECT*. Dec 2012;28(4):250-251.
- Kriss A, Blumhardt LD, Halliday AM, Pratt RT. Neurological asymmetries immediately after unilateral ECT. *J Neurol, Neurosurg & Psychiatry*. December 1, 1978;41(12):1135-1144.
- Kulkarni RR, Melkundi S. Subdural Hematoma: An Adverse Event of Electroconvulsive Therapy—Case Report and Literature Review. *Case reports in psychiatry*. 2012;2012.
- Lambrecq V, Villega F, Marchal C, et al. Refractory status epilepticus: electroconvulsive therapy as a possible therapeutic strategy. *Seizure : the journal of the British Epilepsy Association*. Nov 2012;21(9):661-664.
- Lee K. Acute embolic stroke after electroconvulsive therapy. *J ECT*. 2006;22(1):67-69.

- Li TC, Shiah IS, Sun CJ, Tzang RF, Huang KC, Lee WK. Mirtazapine relieves post-electroconvulsive therapy headaches and nausea: a case series and review of the literature. *J ECT*. Jun 2011;27(2):165-167.
- Liff JM, Bryson EO, Maloutas E, et al. Transient Hemiparesis (Todd's Paralysis) After Electroconvulsive Therapy (ECT) in a Patient With Major Depressive Disorder. *J ECT*. 2013;29(3):247-248.
- Malek-Ahmadi P, Hanretta AT. Successful ECT in a patient with intracranial venous angioma. *J ECT*. Jun 2002;18(2):99-102.
- Martin M, Figiel G, Mattingly G, Zorumski CF, Jarvis MR. ECT-induced interictal delirium in patients with a history of a CVA. *Journal of geriatric psychiatry and neurology*. Jul-Sep 1992;5(3):149-155.
- Martino C, Krysko M, Petrides G, Tobias KG, Kellner CH. Cognitive tolerability of electroconvulsive therapy in a patient with a history of traumatic brain injury. *J ECT*. Mar 2008;24(1):92-95.
- Patkar AA, Hill KP, Weinstein SP, Schwartz SL. ECT in the presence of brain tumor and increased intracranial pressure: evaluation and reduction of risk. *J ECT*. Jun 2000;16(2):189-197.
- Rovers JM, Roks G. Electroconvulsive therapy-induced migraine successfully treated with valproic acid. *J ECT*. Mar 2012;28(1):64-65.
- Taylor RM, Pacella BL. The significance of abnormal electroencephalograms prior to electroconvulsive therapy. *The Journal of nervous and mental disease*. Mar 1948;107(3):220-227.
- van Herck E, Sienaert P, Hagon A. [Electroconvulsive therapy for patients with intracranial aneurysms: a case study and literature review]. *Tijdschrift voor psychiatrie*. 2009;51(1):43-51.
- Viguera A, Rordorf G, Schouten R, Welch C, Drop L. Intracranial haemodynamics during attenuated responses to electroconvulsive therapy in the presence of an intracerebral aneurysm. *J Neurol, Neurosurg & Psychiatry*. 1998;64(6):802-805.
- Weintraub D, Lippmann SB. Electroconvulsive therapy in the acute poststroke period. *J ECT*. Dec 2000;16(4):415-418.
- Weisberg LA, Elliott D, Mielke D. Intracerebral hemorrhage following electroconvulsive therapy. *Neurology*. Nov 1991;41(11):1849.
- Wijeratne C, Shome S. Electroconvulsive therapy and subdural hemorrhage. *J ECT*. Dec 1999;15(4):275-279.
- Ye L, Karlapati SK, Lippmann S. Topiramate for post-electroconvulsive therapy headaches. *J ECT*. Sep 2013;29(3):e49.
- Zahedi S, Yang C, O'Hanlon D, Tanev K, Shea WP. Electroconvulsive therapy and venous angiomas: two case reports and review of the literature. *J ECT*. Sep 2006;22(3):228-230.
